# Supplementary material
Source: PubMed Central journal article supplement (PMC4195417)
Supplement: jn.114.196709_nutrition196709SupplementaryData1.pdf [file jn.114.196709_nutrition196709SupplementaryData1.pdf]

Online Supporting Material

Supplemental Table 1 Comparison of cases and controls by selected descriptive characteristics, the Tennessee Colorectal Polyp Study<sup>1</sup>

| Characteristic                        | Adenoma Cases<br>(N=1336) | Controls<br>(N=2891) | P-value |
|---------------------------------------|---------------------------|----------------------|---------|
| Age (years), Mean ± SD                | 59.5±7.2                  | 57.6±7.6             | <0.001  |
| Sex, %                                |                           |                      | <0.001  |
| Man                                   | 997 (74.7)                | 1619 (56.0)          |         |
| Race, %                               |                           |                      | 0.27    |
| Caucasian                             | 1181 (88.5)               | 2590 (89.6)          |         |
| Recruitment sites, %                  |                           |                      | <0.001  |
| Vanderbilt Medical Center             | 780 (58.4)                | 2159 (74.7)          |         |
| Education, %                          |                           |                      | <0.001  |
| High school or below                  | 426 (33.2)                | 620 (22.3)           |         |
| Some college                          | 373 (29.0)                | 777 (27.9)           |         |
| College graduates                     | 235 (18.3)                | 611 (22.0)           |         |
| Graduates                             | 251 (19.5)                | 772 (27.8)           |         |
| Smoking status, %                     |                           |                      | <0.001  |
| Never smoker                          | 464 (36.0)                | 1517 (54.4)          |         |
| Former smoker                         | 481 (37.3)                | 975 (34.9)           |         |
| Current smoker                        | 343 (26.6)                | 298 (10.7)           |         |
| Alcohol consumption status, %         |                           |                      | <0.001  |
| Never drinker                         | 633 (49.2)                | 1672 (60.0)          |         |
| Former drinker                        | 370 (28.7)                | 568 (20.4)           |         |
| Current drinker                       | 284 (22.1)                | 546 (19.6)           |         |
| Physically active past 10 years, %    | 624 (48.4)                | 1159 (41.5)          | <0.001  |
| BMI (kg/m <sup>2</sup> ), Mean ± SD   | 28.6±5.5                  | 27.9±5.7             | <0.001  |
| Daily nutrients intake, Mean ± SD     |                           |                      |         |
| Total energy (kcal) <sup>2</sup>      | 1827±47                   | 1791±44              | 0.15    |
| Total calcium (mg) <sup>3</sup>       | 969±24                    | 1054±26              | <0.0001 |
| Dietary calcium (mg) <sup>3</sup>     | 766±16                    | 824±17               | <0.0001 |
| Supplement calcium (mg) <sup>2</sup>  | 262±24                    | 268±23               | 0.59    |
| Total magnesium (mg) <sup>3</sup>     | 341±6                     | 363±7                | <0.0001 |
| Dietary magnesium (mg) <sup>3</sup>   | 301±5                     | 318±5                | <0.0001 |
| Supplement magnesium(mg) <sup>2</sup> | 75±5                      | 79±5                 | 0.09    |

<sup>1</sup> Phase I +Phase II

<sup>2</sup> Least square mean value ± SE, adjusting for age (year), site, sex, and race;

<sup>3</sup> Least square mean value ± SE, adjusting for age (year), site, sex, race and total energy

Online Supporting Material

Supplemental table 2 The distribution of genotypes for 19 tagging SNPs in *KCNJ1* and *SLC12A1* in Phase I, the Tennessee Colorectal Polyp Study

| SNP        | Allele <sup>1</sup> | Chromosome | Gene           | Location (bp) <sup>2</sup> | MAF <sup>3</sup> |
|------------|---------------------|------------|----------------|----------------------------|------------------|
| rs11221484 | C/G                 | 11q24      | <i>KCNJ1</i>   | 128244665                  | 0.43/0.41        |
| rs1148058  | A/G                 | 11q24      | <i>KCNJ1</i>   | 128217991                  | 0.17/0.17        |
| rs17137982 | G/C                 | 11q24      | <i>KCNJ1</i>   | 128227400                  | 0.16/0.16        |
| rs2855798  | T/G                 | 11q24      | <i>KCNJ1</i>   | 128238171                  | 0.19/0.19        |
| rs3758766  | G/A                 | 11q24      | <i>KCNJ1</i>   | 128221182                  | 0.17/0.17        |
| rs4529890  | T/C                 | 11q24      | <i>KCNJ1</i>   | 128246290                  | 0.15/0.15        |
| rs4937378  | T/C                 | 11q24      | <i>KCNJ1</i>   | 128248228                  | 0.23/0.23        |
| rs588472   | A/G                 | 11q24      | <i>KCNJ1</i>   | 128206861                  | 0.35/0.35        |
| rs588957   | T/C                 | 11q24      | <i>KCNJ1</i>   | 128206751                  | 0.29/0.31        |
| rs6590354  | T/C                 | 11q24      | <i>KCNJ1</i>   | 128244573                  | 0.03/0.04        |
| rs675482   | G/A                 | 11q24      | <i>KCNJ1</i>   | 128231804                  | 0.31/0.31        |
| rs675759   | C/G                 | 11q24      | <i>KCNJ1</i>   | 128213185                  | 0.16/0.16        |
| rs7116606  | T/C                 | 11q24      | <i>KCNJ1</i>   | 128246949                  | 0.29/0.30        |
| rs1531916  | G/A                 | 15q15      | <i>SLC12A1</i> | 46313563                   | 0.17/0.18        |
| rs2291340  | C/T                 | 15q15      | <i>SLC12A1</i> | 46335268                   | 0.19/0.19        |
| rs6493315  | C/T                 | 15q15      | <i>SLC12A1</i> | 46354306                   | 0.19/0.19        |
| rs8032420  | A/C                 | 15q15      | <i>SLC12A1</i> | 46332673                   | 0.19/0.19        |
| rs9635331  | T/A                 | 15q15      | <i>SLC12A1</i> | 46357429                   | 0.16/0.16        |
| rs964611   | A/C                 | 15q15      | <i>SLC12A1</i> | 46384806                   | 0.16/0.17        |

<sup>1</sup> Minor/Major

<sup>2</sup> Location based on NCBI Human Genome Build 36.1

<sup>3</sup> Risk allele frequency in cases/controls

Online Supporting Material

Supplemental table 3 Association of calcium supplement intake with colorectal adenoma risk stratified by the number of gene with variant alleles, the Tennessee Colorectal Polyp Study<sup>1,2</sup>

| Number of gene with variant alleles    |                | calcium supplement intake level (mg/d) |                 |                 | <i>P</i> _trend |
|----------------------------------------|----------------|----------------------------------------|-----------------|-----------------|-----------------|
|                                        |                | T1 (low)<br>0                          | T2<br>0-324     | T3<br>>324      |                 |
| all adenomas vs controls               |                |                                        |                 |                 |                 |
| Total                                  | Cases/Controls | 566/936                                | 378/911         | 302/890         |                 |
|                                        | OR (95% CI)    | 1.00                                   | 0.73(0.54-0.99) | 0.78(0.58-1.06) | 0.38            |
| 0                                      | Cases/Controls | 219/363                                | 157/412         | 152/356         |                 |
|                                        | OR (95% CI)    | 1.00                                   | 0.56(0.35-0.90) | 0.79(0.49-1.28) | 0.76            |
| ≥1                                     | Cases/Controls | 347/573                                | 221/499         | 150/534         |                 |
|                                        | OR (95% CI)    | 1.00                                   | 0.92(0.60-1.41) | 0.80(0.52-1.22) | 0.22            |
| multiple/advanced adenomas vs controls |                |                                        |                 |                 |                 |
| Total                                  | Cases/Controls | 256/936                                | 166/911         | 116/890         |                 |
|                                        | OR (95% CI)    | 1.00                                   | 0.57(0.37-0.89) | 0.53(0.34-0.84) | 0.02            |
| 0                                      | Cases/Controls | 92/363                                 | 69/412          | 54/356          |                 |
|                                        | OR (95% CI)    | 1.00                                   | 0.52(0.26-1.07) | 0.63(0.31-1.28) | 0.54            |
| ≥1                                     | Cases/Controls | 164/573                                | 97/499          | 62/534          |                 |
|                                        | OR (95% CI)    | 1.00                                   | 0.59(0.30-1.13) | 0.46(0.24-0.89) | 0.02            |

<sup>1</sup> Phase I +Phase II

<sup>2</sup> Unconditional logistic regression models adjusting for age (continuous), sex, race (Caucasian, others), education (categorical), recruitment sites, body mass index (categorical), smoking status (never, former, current), alcohol drinking status (never, former, current), physical activity (yes, no), and daily total energy, daily diet intakes of calcium, magnesium and magnesium supplement intake (continuous)

Online Supporting Material

Supplemental table 4 Association of calcium intake with colorectal adenoma risk stratified by the number of gene with variant alleles among those screening participants, the Tennessee Colorectal Polyp Study<sup>1-2</sup>

| Number of genes with variant alleles   |                | calcium intake level (mg/d) |                 |                 | <i>P</i> _trend |
|----------------------------------------|----------------|-----------------------------|-----------------|-----------------|-----------------|
|                                        |                | <1000                       | 1000-1300       | ≥1300           |                 |
| all adenomas vs controls               |                |                             |                 |                 |                 |
| Total                                  | Cases/Controls | 313/598                     | 131/328         | 289/660         |                 |
|                                        | OR (95% CI)    | 1.00                        | 0.82(0.62-1.08) | 0.94(0.71-1.25) | 0.71            |
| 0                                      | Cases/Controls | 114/259                     | 60/126          | 143/256         |                 |
|                                        | OR (95% CI)    | 1.00                        | 1.18(0.76-1.81) | 1.28(0.83-1.96) | 0.26            |
| ≥1                                     | Cases/Controls | 199/339                     | 71/202          | 146/404         |                 |
|                                        | OR (95% CI)    | 1.00                        | 0.62(0.43-0.90) | 0.71(0.48-1.03) | 0.08            |
| 1                                      | Cases/Controls | 154/275                     | 65/161          | 126/319         |                 |
|                                        | OR (95% CI)    | 1.00                        | 0.75(0.50-1.12) | 0.81(0.53-1.22) | 0.33            |
| 2                                      | Cases/Controls | 45/64                       | 6/41            | 20/85           |                 |
|                                        | OR (95% CI)    | 1.00                        | 0.20(0.07-0.61) | 0.41(0.16-1.09) | 0.06            |
| Multiple/advanced adenomas vs controls |                |                             |                 |                 |                 |
| Total                                  | Cases/Controls | 136/598                     | 62/328          | 116/660         |                 |
|                                        | OR (95% CI)    | 1.00                        | 0.88(0.61-1.29) | 0.83(0.57-1.23) | 0.36            |
| 0                                      | Cases/Controls | 44/259                      | 29/126          | 58/256          |                 |
|                                        | OR (95% CI)    | 1.00                        | 1.58(0.87-2.89) | 1.46(0.78-2.71) | 0.25            |
| ≥1                                     | Cases/Controls | 92/339                      | 33/202          | 58/404          |                 |
|                                        | OR (95% CI)    | 1.00                        | 0.57(0.35-0.95) | 0.52(0.31-0.87) | 0.01            |
| 1                                      | Cases/Controls | 69/275                      | 31/161          | 51/319          |                 |
|                                        | OR (95% CI)    | 1.00                        | 0.77(0.45-1.32) | 0.66(0.38-1.16) | 0.15            |
| 2                                      | Cases/Controls | 23/64                       | 2/41            | 7/85            |                 |
|                                        | OR (95% CI)    | 1.00                        | 0.08(0.01-0.51) | 0.13(0.03-0.60) | 0.006           |

<sup>1</sup>Phase I +Phase II

<sup>2</sup>Unconditional logistic regression models adjusting for age (continuous), sex, race (Caucasian, others), education (categorical), recruitment sites, body mass index (categorical), smoking status (never, former, current), alcohol drinking status (never, former, current), physical activity (yes, no), and daily intakes of total energy, magnesium (continuous)

<sup>3</sup>The *P* for interactions between calcium intake (continuous) and combined SNPs polymorphism (rs2855798 in *KCNJ1* and rs1531916 in *SLC12A1*) were  $6.6 \times 10^{-7}$  for adenomas and  $5.7 \times 10^{-5}$  for multiple /advanced adenomas.
